# Supplementary material for: Study on the different mechanoluminescence of anthracene derivatives
Source: Royal Society of Chemistry journal article supplement (doi:10.1039/d1ma01100f), 2022-01-01
Supplement: d1ma01100f1.pdf [file d1ma01100f1.pdf]

## Electronic Supplementary Information

# The Study on The Different Mechanoluminescence of Anthracene Derivatives

Jun Miao<sup>1</sup>, Zhaoxia Zhang<sup>1</sup>, Zhiyuan Cui, Ming Zhang \*

### Table of Contents

#### 1. Experimental Section

Instruments and methods.

#### 2. Synthesis

Scheme S1. The synthetic route of BN, BO, BE and BB.

#### 3. Figures and Table

**Figure S1.** UV-visible absorption spectra of BN, BO, BE and BB in THF solutions ( $10^{-5}$ M).

**Table S1.** Optical properties of BN, BO, BE and BB.

**Figure S2.** The intermolecular interactions including C-H $\cdots\pi$  (green) and C-H $\cdots$ O (red lines) in BN crystal (eight molecules).

**Table S2.** Summarization of the C-H $\cdots\pi$ , C-H $\cdots$ O intermolecular interactions in BN crystal.

**Figure S3.** The intermolecular interactions including C-H $\cdots\pi$  (green /violet lines), C-H $\cdots$ O (red lines) in BO crystal (eight molecules).

**Table S3.** Summarization of the C-H $\cdots\pi$ , C-H $\cdots$ O intermolecular interactions in BO crystal.

**Figure S4.** The intermolecular interactions including C-H $\cdots\pi$  (green),  $\pi\cdots\pi$ (orange), C-H $\cdots$ O (red lines) in BE crystal (eight molecules).

**Table S4.** Summarization of the C-H $\cdots\pi$ ,  $\pi\cdots\pi$ , C-H $\cdots$ O intermolecular interactions in BE crystal.

**Figure S5.** The intermolecular interactions including C-H $\cdots\pi$  (green /violet lines), C-H $\cdots$ O (red lines) in BB crystal (eight molecules).

**Table S5.** Summarization of the C-H $\cdots\pi$ , C-H $\cdots$ O intermolecular interactions in BB crystal.

**Table S6.** The Crystal data of BN, BO, BE and BB.

**Table S7.** Structural data crystal of BN, BO, BB and BE.

**Figure S6.** The PXRD patterns of BN (a) and BO (b) in the crystalline state, after light grinding and heavy grinding, respectively.

**Figure S7.** The HOMO-LUMO levels, energy gaps and dipole moments of isolated molecules in BN(a), BO BE and BB(b). (Calculated at the B3LYP/6-31G (d, p) level).

**Figure S8.** The HOMO-LUMO levels, energy gaps and dipole moments of coupled moleculars in BN crystal calculated at the B3LYP/6-31g (d, p) level.

**Figure S 9, 10,11, 12, 13.** The  $^1\text{H}$  NMR spectrum of BN, BE, 1, BB and BO.

**Figure S14,15,16, 17.** The  $^{13}\text{C}$  NMR spectrum of BN, BE, BB and BO.

**Figure S18.** DSC curves of the BN, BO, BE and BB.

## 1. Experimental Section

**Instruments and methods:**  $^1\text{H}$  and  $^{13}\text{C}$  spectra were recorded on a 500MHz Bruker AVANCZ III spectrometer, DMSO were selected as the solvent with tetramethylsilane (TMS) as the internal standard ( $\delta = 0.00$  ppm). A Thermo Fisher ITQ1100 GC-MS mass detector was used to record the mass spectra. UV-vis absorption spectra was performed on UV-2550 spectrophotometer and photoluminescence spectra were recorded RF-5301PC spectrofluorophotometer. Fluorescence decay was measured on an Edinburgh FLS980 fluorescence spectrophotometer and absolute photoluminescence quantum yield (PLQY) was measured on an Edinburgh FLS920 fluorescence spectrophotometer. The PXRD (powder X-ray diffraction) patterns were recorded on a Rigaku SmartLab (3) diffractometer at a scan rate of  $5^\circ/\text{min}$ . The ML spectra were measured on Ocean Optics spectrometer as a power detector. The single-crystal X-ray diffraction data were recorded by a R-Axis RAPID diffractometer. The ground state ( $S_0$ ) geometry was obtained from the single crystal structure and no further geometry optimization was conducted in order to maintain the specific molecular configuration and corresponding intermolecular locations. DSC measurements were carried out on a NETZSCH DSC 200F3 instrument at a heating rate and a cooling rate of  $10^\circ\text{C min}^{-1}$  in nitrogen.

## 2. Synthesis

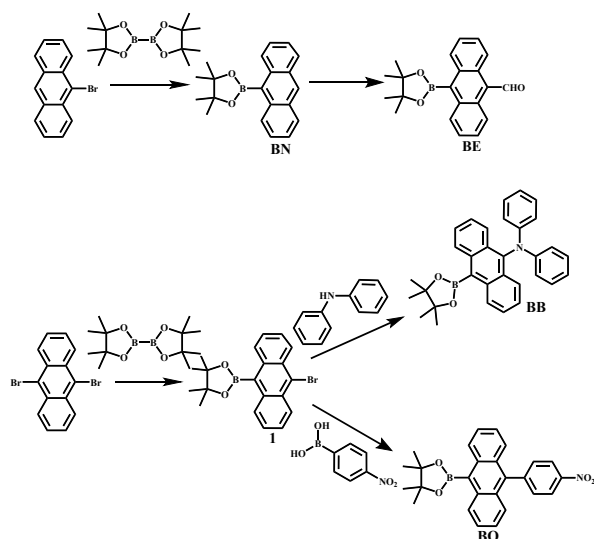

Scheme S1. The synthetic route of BN, BO, BE and BB.

### Synthesis of 2-(anthracen-9-yl)-4, 4, 5, 5-tetramethyl-1, 3, 2-dioxaborolane

#### (BN):

a mixture of 9-bromoanthracene (257.1 mg, 1 mmol), bis(pinacolato)diboron (380.9 mg, 1.5 mmol), Pd(dppf)Cl<sub>2</sub> (24.5 mg, 0.03 mmol) and potassium acetate (588.8 mg, 6 mmol) were dissolved in 10 mL of 1,4-dioxane. The solution was heated with stirring at 80 °C for 24 h under nitrogen. The cooled mixture was washed with water and extracted with methylene chloride (DCM). Then the DCM solution was dried with anhydrous magnesium sulfate overnight. After removing the solvent, the obtained crude product was purified by silica gel chromatography using DCM/petroleum ether (1:4, v/v) as elute, to obtained white solid of BN. The yield was 80.3%, 246.5 mg. <sup>1</sup>H NMR (500 MHz, DMSO) δ 8.68 (s, 1H), 8.31 (d, J = 8.6 Hz, 2H), 8.11 (d, J = 7.9 Hz, 2H), 7.59 – 7.50 (m, 4H), 1.53 (s, 12H). MS (ESI), m/z: 303.89, calcd for C<sub>20</sub>H<sub>21</sub>BO<sub>2</sub>:304.20.

### **Synthesis of 10-(4, 4, 5, 5-tetramethyl-1, 3, 2-dioxaborolan-2-yl) anthracene -9-**

#### **carbaldehyde (BE):**

Under the protection of nitrogen, the BN (304.2 mg, 1 mmol ) obtained above was added into anhydrous tetrahydrofuran (10ml). Then, adding n-butyllithium (2.5M, 0.5 ml) under -70 °C. Stirring for one hour, adding dimethyl formamide (80.4 mg, 1.1 mmol) to solution slowly. After addition, keep stirring at this temperature for one hour, and then naturally rise to room temperature and stir for three hours. After the test reaction was completed, deionized water was added to quench the reaction. The cooled mixture was extracted with DCM. Then the DCM solution was dried with anhydrous magnesium sulfate overnight. After removing the solvent, the obtained crude product was purified by silica gel chromatography using DCM/petroleum ether (1:1, v/v) as elute, to obtained yellow solid of BE. The yield was 83.3%. <sup>1</sup>H NMR (500 MHz, DMSO) δ 11.49 (s, 1H), 8.95 (s, 2H), 8.25 (d, J = 8.5 Hz, 2H), 7.75 (s, 2H), 7.68 (s, 2H), 1.56 (s, 12H). MS (ESI), m/z: 331.59, calcd for C<sub>21</sub>H<sub>21</sub>BO<sub>3</sub>:332.21.

#### **Synthesis of 2-(10-bromoanthracen-9-yl)-4, 4, 5, 5 -tetramethyl-1, 3, 2 – dioxaborolane (1):**

A mixture of 9, 10-dibromoanthracene (336.2 mg, 1 mmol), bis(pinacolato)diboron (380.9 mg, 1.5 mmol), Pd(dppf)Cl<sub>2</sub> (24.5 mg, 0.03 mmol) and potassium acetate (588.8 mg, 6 mmol) were dissolved in 10 mL of 1,4-dioxane. The solution was heated with stirring at 80 °C for 24 h under nitrogen. The cooled mixture was washed with water and extracted with DCM. Then the DCM solution was dried with anhydrous magnesium sulfate overnight. After removing the solvent, the obtained crude product was purified by silica gel chromatography using DCM/petroleum ether (1:4, v/v) as elute, to obtained light green solid of 1. The yield was 85.3%, 325.5 mg. <sup>1</sup>H NMR (500 MHz, DMSO) δ 8.50 (d, J = 8.8 Hz, 2H), 8.28 (d, J = 8.6 Hz, 2H), 7.76 – 7.70 (m, 2H), 7.70 – 7.63 (m, 2H), 1.54 (s, 12H). MS (ESI), m/z: 383.85, calcd for C<sub>20</sub>H<sub>20</sub>BBrO<sub>2</sub>:383.07.

**Synthesis of N, N-diphenyl-10-(4, 4, 5, 5-tetramethyl-1, 3, 2-dioxaborolan-2-yl) anthracen-9-amine (BB):**

In a nitrogen atmosphere, diphenylamine (169.2 mg, 1.2 mmol), compound 1 (383.2 mg, 1 mmol), Pd<sub>2</sub>(dba)<sub>3</sub> (27 mg, 0.03 mmol), *t*-Bu<sub>3</sub>P (8 mg, 0.09 mmol) and *t*-BuOK (108 mg, 1 mmol) were dissolved in 15 ml of toluene, and then stirred at a temperature of 85 °C for 4 hours. The reaction solution was cooled to room temperature, and then extraction was performed with water and DCM. The organic extracts were dried over anhydrous magnesium sulfate and concentrated by rotary evaporation. The obtained product was purified by silica gel chromatography using DCM as elute, to obtain yellow solid of BB. The yield was 61.5%. <sup>1</sup>H NMR (500 MHz, DMSO) δ 8.37 (d, J = 8.7 Hz, 2H), 8.06 (d, J = 8.7 Hz, 2H), 7.60 – 7.55 (m, 2H), 7.52 – 7.47 (m, 2H), 7.19 (t, J = 7.9 Hz, 4H), 6.97 – 6.87 (m, 6H), 1.55 (s, 12H). MS (ESI), m/z: 470.43, calcd for C<sub>32</sub>H<sub>30</sub>BNO<sub>2</sub>:471.41.

**Synthesis of 4, 4, 5, 5-tetramethyl-2-(10-(4-nitrophenyl) anthracen-9-yl) - 1, 3, 2-dioxaborolane (BO):**

A mixture of compound 1 (383.2 mg, 1 mmol), (4-nitrophenyl)boronic acid (167.0 mg, 1 mmol), and Pd(PPh<sub>3</sub>)<sub>4</sub> (0.03 mmol, 34.5 mg) were added into a 50 mL flask. Potassium carbonate (1.1 mmol, 0.7 g) was dissolved in 4 mL water and then the solution was added to the 50 mL flask. Toluene (12 mL) and ethyl alcohol (5 mL) were added to the above flask, and the solution was refluxed at 85 °C for 48 h under nitrogen. The cooled mixture was quenched with dilute hydrochloric acid solution and extracted with DCM. The organic extracts were dried over anhydrous magnesium sulfate and concentrated by rotary evaporation. The obtained product was purified by silica gel chromatography using DCM as elute, to obtain yellow solid of BO. The yield was 64.5%. <sup>1</sup>H NMR (500 MHz, DMSO) δ 8.49 (d, J = 8.5 Hz, 2H), 8.34 (d, J = 8.7 Hz, 2H), 7.71 (d, J = 8.5 Hz, 2H), 7.59 (dd, J = 8.5, 4.0 Hz, 2H), 7.47 (d, J = 3.4 Hz, 4H), 1.56 (s, 12H). MS (ESI), m/z: 424.86, calcd for C<sub>26</sub>H<sub>24</sub>BNO<sub>4</sub>:425.29.

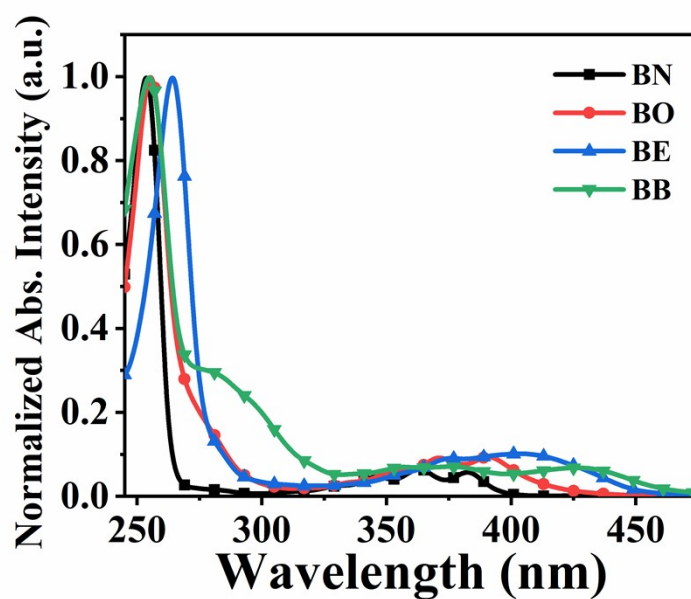

**Fig. S1** UV-visible absorption spectra of BN, BO, BE and BB in THF solutions ( $10^{-5}$ M).

**Table. S1** Optical properties of BN, BO, BE and BB

| Compound       | $\lambda_{em}(nm)$ | $\Phi F$ (%) | $\tau$ (ns) | $K_r$ ( $10^8 s^{-1}$ ) | $K_{nr}$ ( $10^8 s^{-1}$ ) |
|----------------|--------------------|--------------|-------------|-------------------------|----------------------------|
| BN(Solution)a  | 425                | 36.77        | 7.23        | 0.509                   | 0.875                      |
| BN(Powder)     | 431                | 33.03        | 8.42        | 0.392                   | 0.795                      |
| BO(Solution) a | 545                | 9.48         | 3.19        | 0.297                   | 2.84                       |
| BO (Powder)    | 500                | 2.54         | 1.73        | 0.147                   | 5.64                       |
| BE(Solution) a | 430                | 0.09         | 3.81        | 0.00236                 | 2.62                       |
| BE(Powder)     | 545                | 5.16         | 16.2        | 0.0318                  | 0.584                      |
| BB(Solution) a | 510                | 55.76        | 17.3        | 0.322                   | 0.255                      |
| BB(Powder)     | 495                | 36.34        | 12.9        | 0.282                   | 0.494                      |

a: Measured in a dilute THF solution,  $10^{-5}$  M;

The radiative rate ( $K_r$ ) can be obtained using equation  $K_r = \Phi F / \tau$ ;

The non-radiative rate ( $K_{nr}$ ) can be estimated from the equation  $\Phi F = K_r / (K_r + K_{nr})$

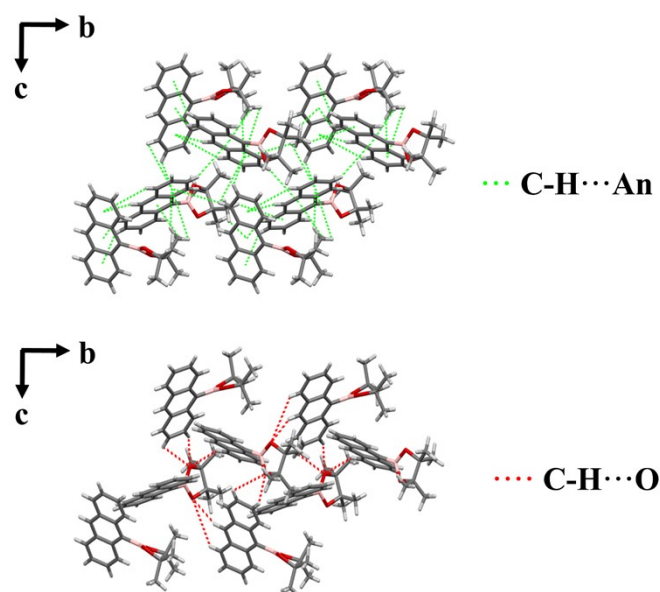

**Fig. S2** The intermolecular interactions including C-H... $\pi$  (green) and C-H...O (red lines) in BN crystal (eight molecules).

**Table. S2** Summarization of the C-H... $\pi$ , C-H...O intermolecular interactions in BN crystal.

| Molecule | Orientation of Interaction | d /Å     | Number |   |
|----------|----------------------------|----------|--------|---|
| BN       | 1                          | C-H...An | 3.932  | 4 |
|          | 2                          | C-H...An | 2.859  | 4 |
|          | 3                          | C-H...An | 3.063  | 4 |
|          | 4                          | C-H...An | 3.793  | 4 |
|          | 5                          | C-H...An | 3.993  | 4 |
|          | 6                          | C-H...An | 2.993  | 4 |
|          | 7                          | C-H...An | 3.293  | 4 |
|          | 8                          | C-H...An | 3.159  | 3 |
|          | 9                          | C-H...An | 3.844  | 3 |
|          | 10                         | C-H...An | 3.638  | 3 |
|          | 11                         | C-H...An | 3.931  | 2 |
|          | 12                         | C-H...An | 3.822  | 2 |
|          | 13                         | C-H...An | 3.681  | 2 |
|          | 1                          | C-H...O  | 3.502  | 3 |
|          | 2                          | C-H...O  | 2.611  | 3 |
|          | 3                          | C-H...O  | 3.978  | 2 |
|          | 4                          | C-H...O  | 3.811  | 2 |
|          | 5                          | C-H...O  | 3.795  | 2 |

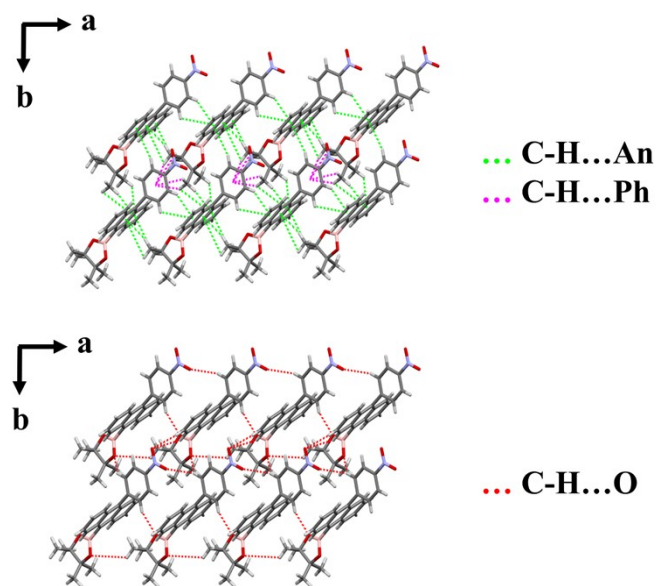

**Fig. S3** The intermolecular interactions including C-H $\cdots\pi$  (green /violet lines), C-H $\cdots$ O (red lines) in BO crystal (eight molecules).

**Table. S3** Summarization of the C-H $\cdots\pi$ , C-H $\cdots$ O intermolecular interactions in BO crystal.

| Molecule | Orientation of Interaction | d /Å            | Number |   |
|----------|----------------------------|-----------------|--------|---|
| BO       | 1                          | C-H $\cdots$ An | 2.761  | 6 |
|          | 2                          | C-H $\cdots$ An | 2.620  | 6 |
|          | 3                          | C-H $\cdots$ An | 3.854  | 6 |
|          | 4                          | C-H $\cdots$ An | 2.887  | 6 |
|          | 5                          | C-H $\cdots$ An | 3.770  | 6 |
|          | 6                          | C-H $\cdots$ An | 3.311  | 4 |
|          | 7                          | C-H $\cdots$ An | 3.489  | 4 |
|          | 8                          | C-H $\cdots$ An | 2.603  | 4 |
|          | 9                          | C-H $\cdots$ An | 3.872  | 4 |
|          | 10                         | C-H $\cdots$ Ph | 3.985  | 3 |
|          | 11                         | C-H $\cdots$ Ph | 3.282  | 3 |
|          | 12                         | C-H $\cdots$ Ph | 3.540  | 3 |
|          | 13                         | C-H $\cdots$ Ph | 3.881  | 3 |
|          | 1                          | C-H $\cdots$ O  | 2.720  | 6 |
|          | 2                          | C-H $\cdots$ O  | 3.048  | 6 |
|          | 3                          | C-H $\cdots$ O  | 3.850  | 6 |
|          | 4                          | C-H $\cdots$ O  | 3.504  | 4 |
|          | 5                          | C-H $\cdots$ O  | 2.683  | 3 |
|          | 6                          | C-H $\cdots$ O  | 2.939  | 3 |



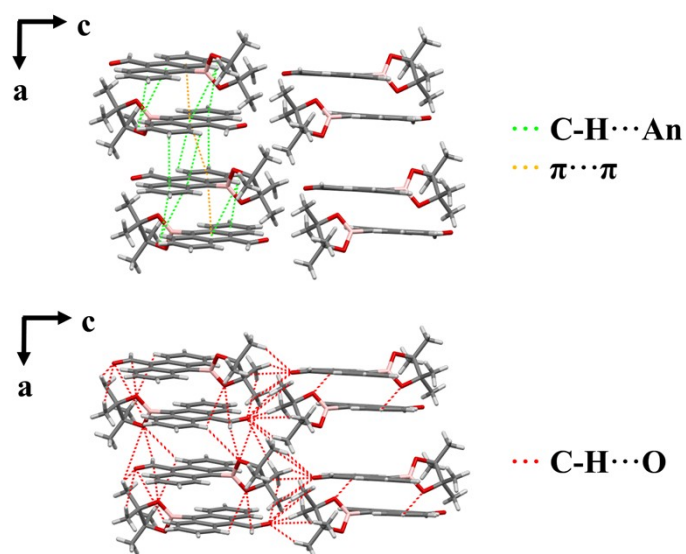

**Fig. S4** The intermolecular interactions including C-H... $\pi$  (green),  $\pi$ ... $\pi$ (orange), C-H...O (red lines) in BE crystal (eight molecules).

**Table. S4** Summarization of the C-H... $\pi$ ,  $\pi$ ... $\pi$ , C-H...O intermolecular interactions in BE crystal.

| Molecule | Orientation of Interaction | d /Å            | Number |   |
|----------|----------------------------|-----------------|--------|---|
| BE       | 1                          | C-H...An        | 3.499  | 4 |
|          | 2                          | C-H...An        | 3.804  | 4 |
|          | 3                          | C-H...An        | 3.385  | 2 |
|          | 4                          | C-H...An        | 3.730  | 2 |
|          | 1                          | $\pi$ ... $\pi$ | 3.665  | 1 |
|          | 2                          | $\pi$ ... $\pi$ | 3.656  | 2 |
|          | 1                          | C-H...O         | 2.927  | 4 |
|          | 2                          | C-H...O         | 2.845  | 4 |
|          | 3                          | C-H...O         | 2.958  | 4 |
|          | 4                          | C-H...O         | 3.060  | 4 |
|          | 5                          | C-H...O         | 2.635  | 4 |
|          | 6                          | C-H...O         | 3.938  | 4 |
|          | 7                          | C-H...O         | 3.034  | 4 |
|          | 8                          | C-H...O         | 3.942  | 4 |
|          | 9                          | C-H...O         | 2.785  | 4 |
|          | 10                         | C-H...O         | 3.966  | 2 |
|          | 11                         | C-H...O         | 3.941  | 2 |
|          | 12                         | C-H...O         | 2.551  | 2 |
|          | 13                         | C-H...O         | 3.118  | 2 |
|          | 14                         | C-H...O         | 3.180  | 1 |
|          | 15                         | C-H...O         | 3.299  | 1 |

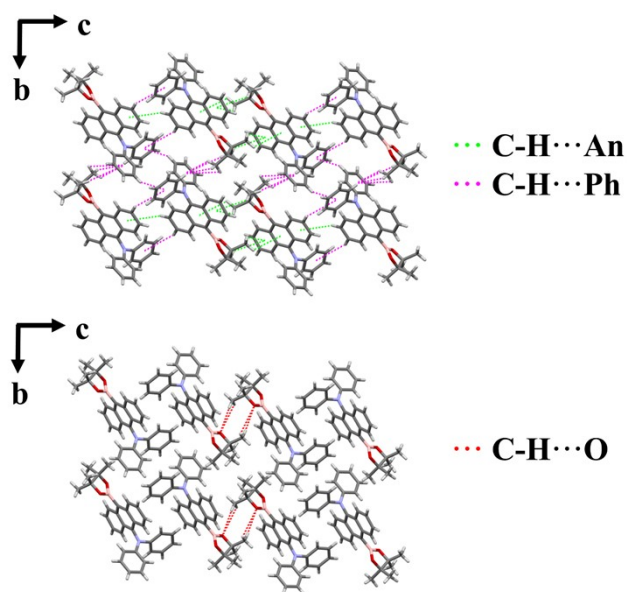

**Fig. S5** The intermolecular interactions including C-H··· $\pi$  (green /violet lines), C-H···O (red lines) in BB crystal (eight molecules).

**Table. S5** Summarization of the C-H... $\pi$ , C-H···O intermolecular interactions in BB crystal.

| Molecule | Orientation of Interaction | d /Å     | Number |   |
|----------|----------------------------|----------|--------|---|
| BB       | 1                          | C-H···An | 3.853  | 4 |
|          | 2                          | C-H···An | 3.221  | 4 |
|          | 3                          | C-H···An | 3.461  | 4 |
|          | 4                          | C-H···An | 3.426  | 4 |
|          | 1                          | C-H···Ph | 3.911  | 4 |
|          | 2                          | C-H···Ph | 3.459  | 4 |
|          | 3                          | C-H···Ph | 3.814  | 4 |
|          | 4                          | C-H···Ph | 2.951  | 4 |
|          | 5                          | C-H···Ph | 3.640  | 4 |
|          | 6                          | C-H···Ph | 3.878  | 4 |
|          | 1                          | C-H···O  | 3.193  | 4 |
|          | 2                          | C-H···O  | 3.294  | 4 |

**Table. S6** The Crystal data of BN, BO, BE and BB.

| Compound | Crystal system | Space group        | Symmetry            | ML property |
|----------|----------------|--------------------|---------------------|-------------|
| BN       | monoclinic     | P2 <sub>1</sub>    | Non-Centrosymmetric | Active      |
| BO       | triclinic      | P1                 | Non-Centrosymmetric | Weak-Active |
| BE       | monoclinic     | P2 <sub>1</sub> /c | Centrosymmetric     | Inactive    |
| BB       | triclinic      | P-1                | Centrosymmetric     | Inactive    |

**Table. S7** Structural data crystal of BN, BO, BE and BB.

| Name                               | BN                                              | BO                                               | BE                                              | BB                                               |
|------------------------------------|-------------------------------------------------|--------------------------------------------------|-------------------------------------------------|--------------------------------------------------|
| Empirical formula                  | C <sub>20</sub> H <sub>21</sub> BO <sub>2</sub> | C <sub>26</sub> H <sub>24</sub> BNO <sub>4</sub> | C <sub>21</sub> H <sub>21</sub> BO <sub>3</sub> | C <sub>32</sub> H <sub>30</sub> BNO <sub>2</sub> |
| Wavelength (Å)                     | 0.71073                                         | 0.71073                                          | 0.71073                                         | 0.71073                                          |
| Crystal system                     | monoclinic                                      | triclinic                                        | monoclinic                                      | triclinic                                        |
| Space group                        | P2 <sub>1</sub>                                 | P1                                               | P2 <sub>1</sub> /c                              | P-1                                              |
| Unit cell Angles (°)               | α=90                                            | α=96.665(3)                                      | α=90                                            | α=93.642(3)                                      |
|                                    | β=109.928(2)                                    | β=110.884(3)                                     | β=96.3500(10)                                   | β=99.389(3)                                      |
|                                    | γ=90                                            | γ=101.244(3)                                     | γ=90                                            | γ=103.657(3)                                     |
| Unit cell lengths (Å)              | a=10.6429(5)                                    | a=7.4244(5)                                      | a=7.1705(3)                                     | a= 7.3775(5)                                     |
|                                    | b=11.1771(5)                                    | b=8.6004(6)                                      | b=10.3149(5)                                    | b= 10.9532(9)                                    |
|                                    | c=15.0198(7)                                    | c=9.7179(7)                                      | c=23.0801(10)                                   | c=16.1075(12)                                    |
| Unit cell volume (Å <sup>3</sup> ) | 1679.72(14)                                     | 556.84(7)                                        | 1696.60(13)                                     | 1240.77(16)                                      |
| Z                                  | 4                                               | 1                                                | 4                                               | 2                                                |
| Density (g/cm <sup>3</sup> )       | 1.203                                           | 1.268                                            | 1.301                                           | 1.262                                            |
| F (000)                            | 648.0                                           | 224.0                                            | 704.0.                                          | 500.0                                            |
| CCDC number                        | 2048014                                         | 2048016                                          | 2048015                                         | 2089171                                          |

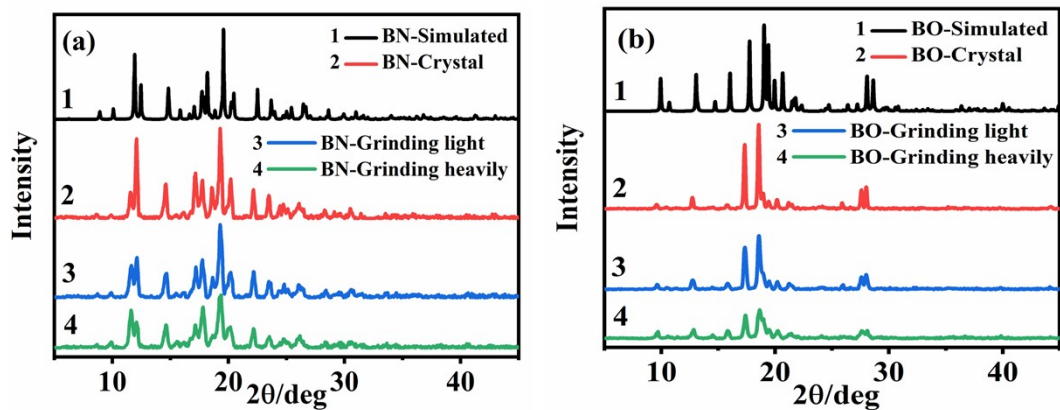

**Fig. S6** The PXR D patterns of BN (a) and BO (b) in the crystalline state, after light grinding and heavy grinding, respectively.

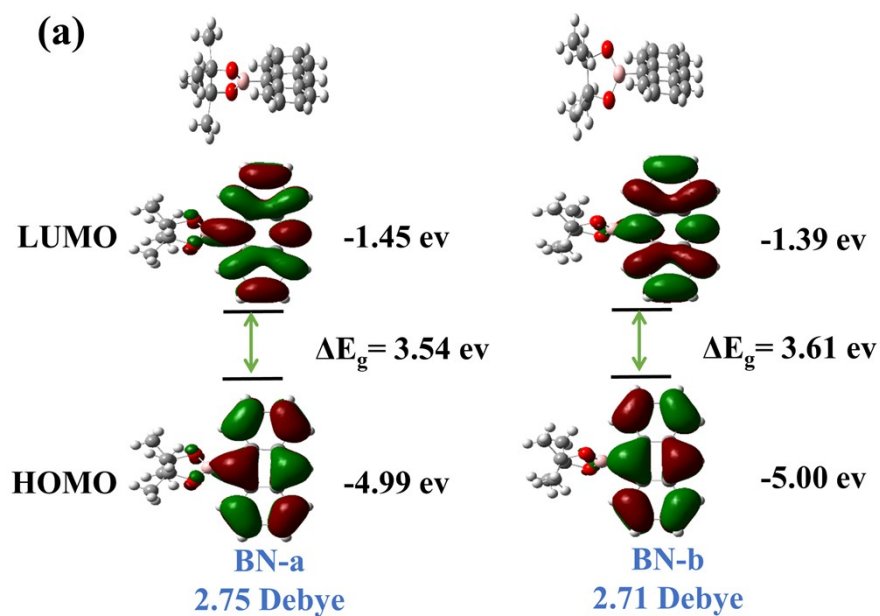

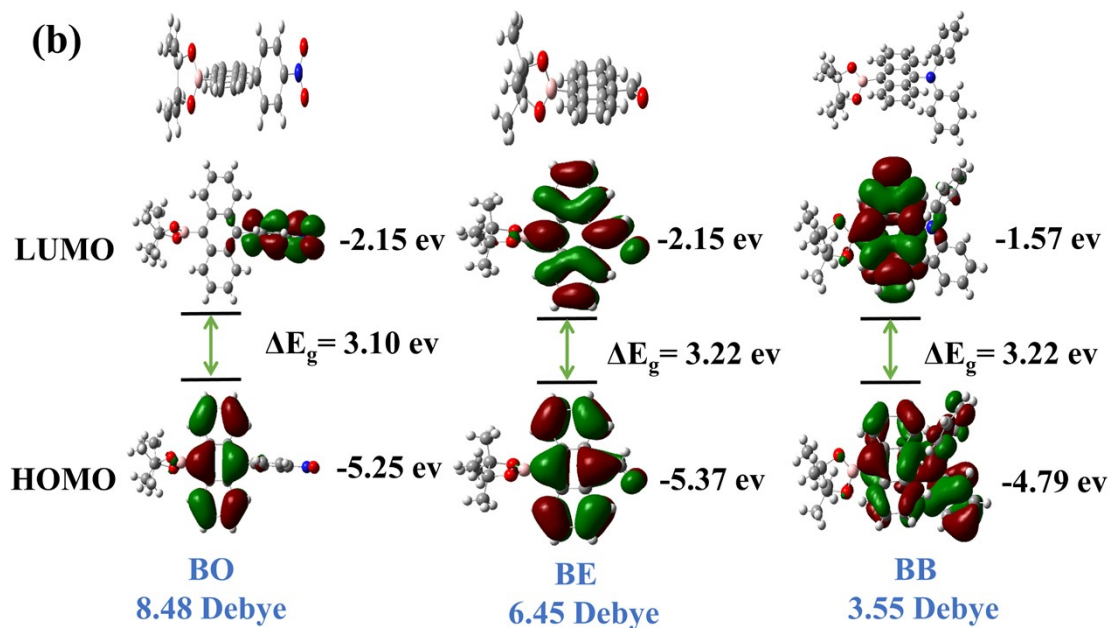

**Fig. S7** The HOMO-LUMO levels, energy gaps and dipole moments of isolated molecules in BN(a), BO BE and BB(b). (Calculated at the B3LYP/6-31G (d, p) level).

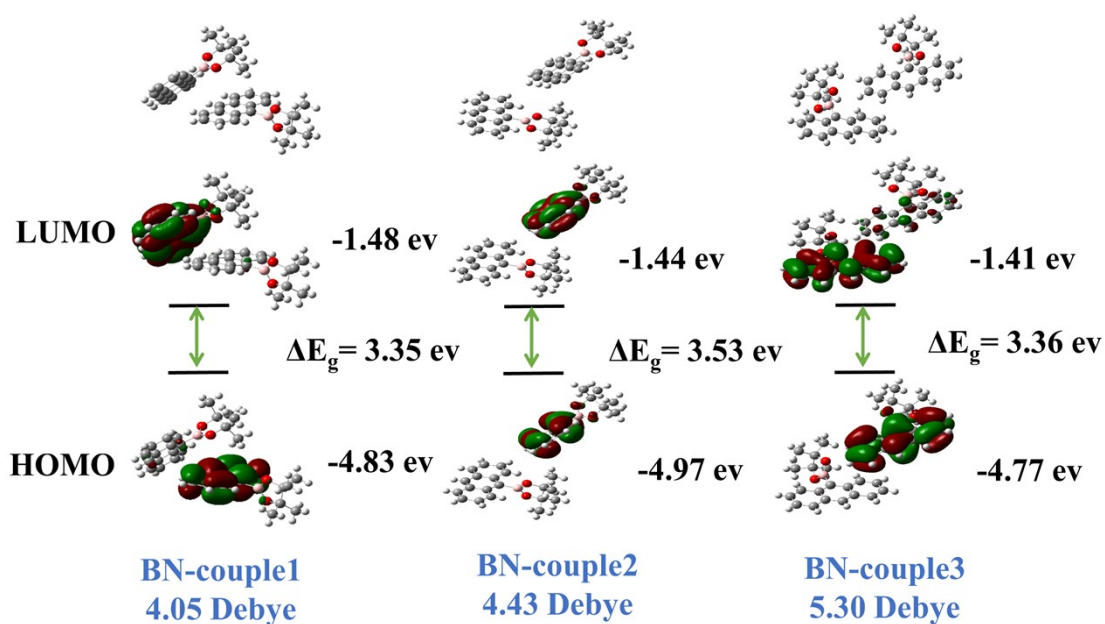

**Fig. S8** The HOMO-LUMO levels, energy gaps and dipole moments of coupled moleculars in BN crystal calculated at the B3LYP/6-31g (d, p) level.

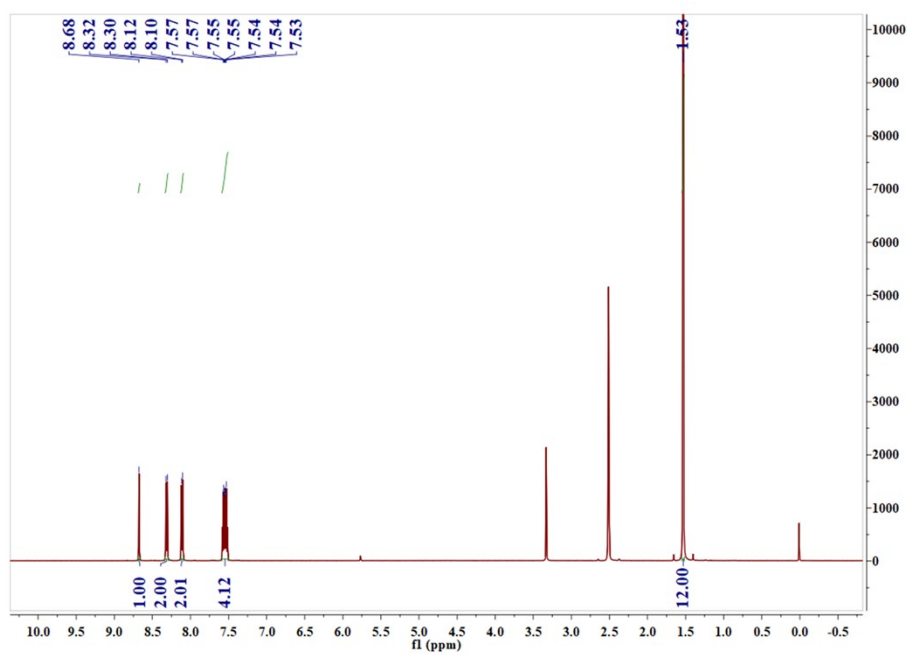

Fig. S9  $^1\text{H}$  NMR spectrum of BN conducted in DMSO.

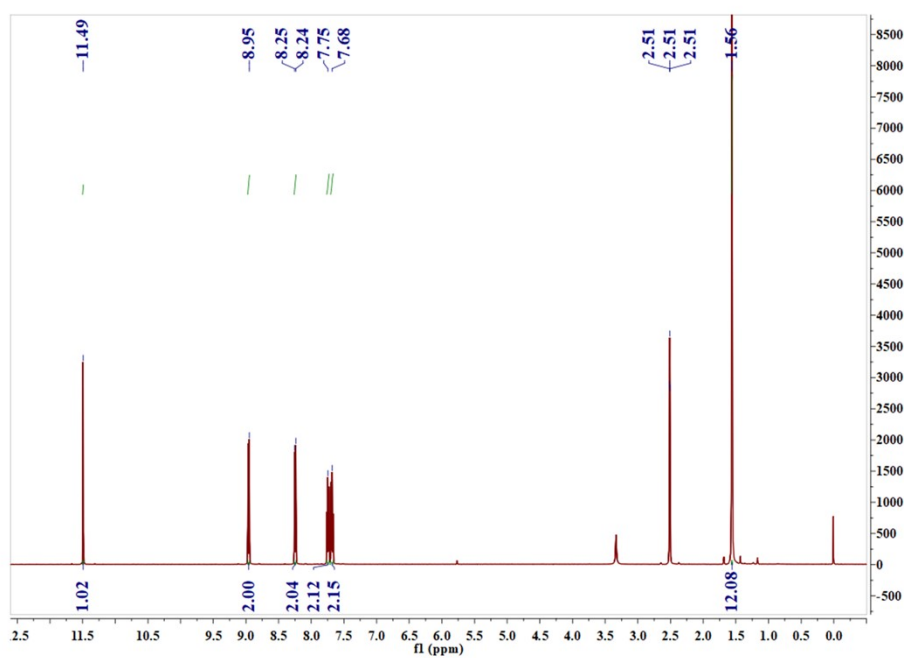

Fig. S10  $^1\text{H}$  NMR spectrum of BE conducted in DMSO.

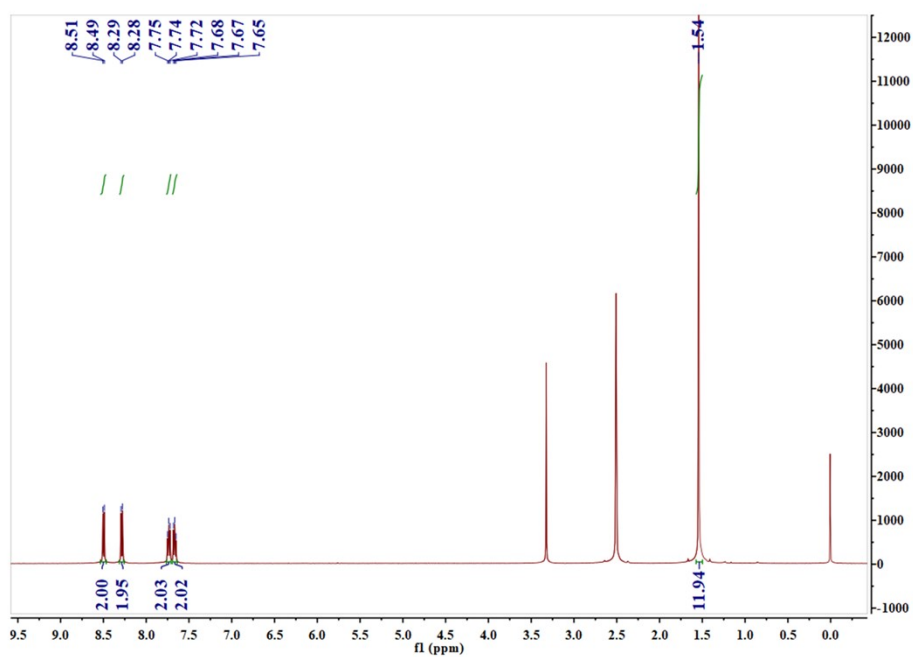

Fig. S11  $^1\text{H}$  NMR spectrum of 1 conducted in DMSO.

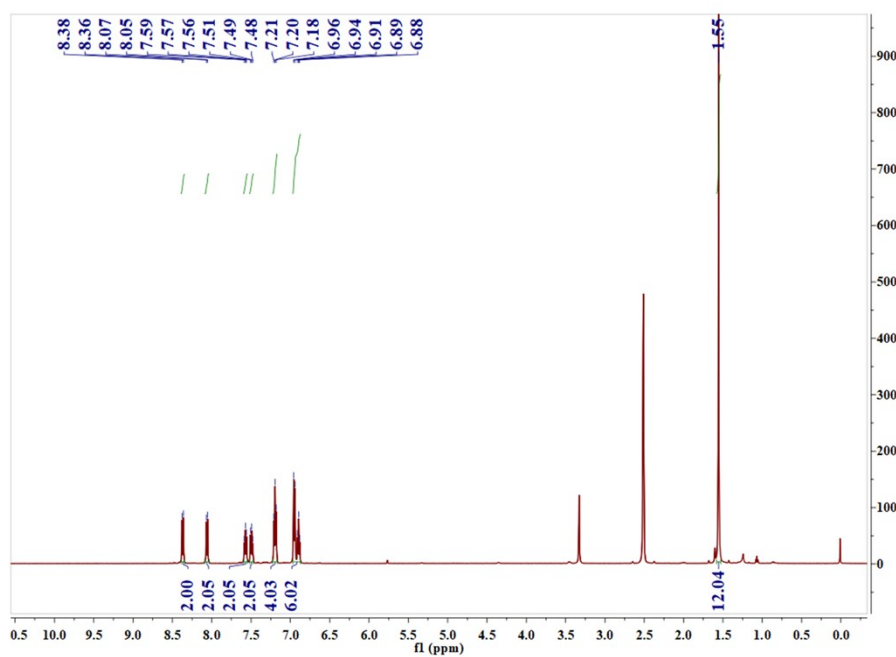

Fig. S12  $^1\text{H}$  NMR spectrum of BB conducted in DMSO.

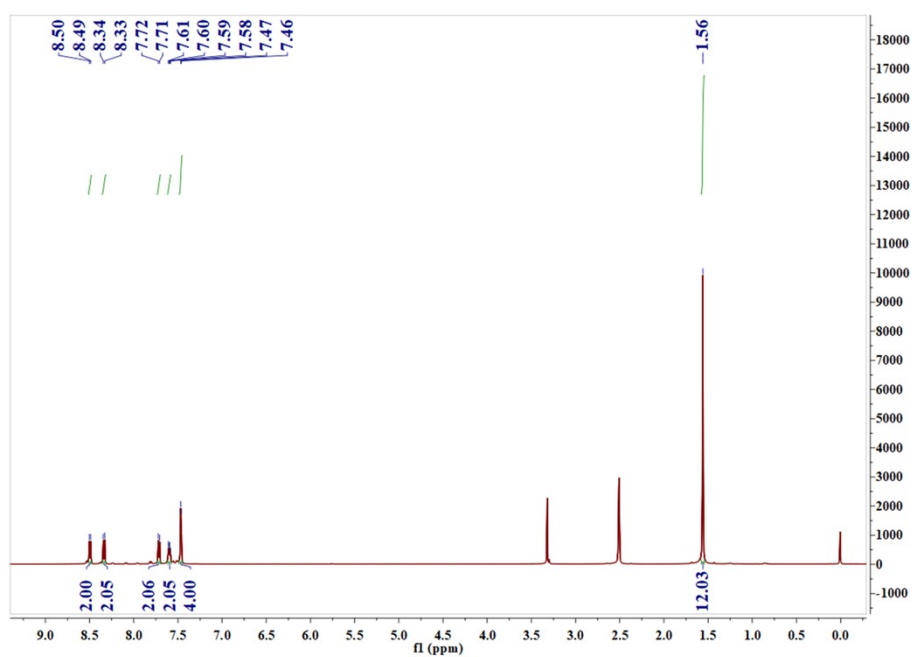

Fig. S13  $^1\text{H}$  NMR spectrum of BO conducted in DMSO.

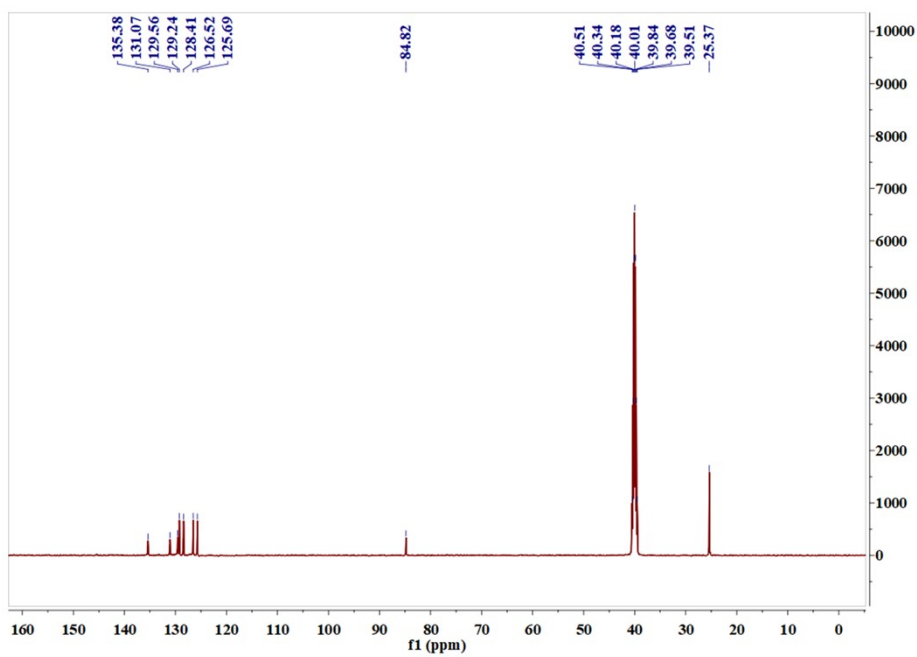

Fig. S14  $^{13}\text{C}$  NMR spectrum of BN conducted in DMSO.



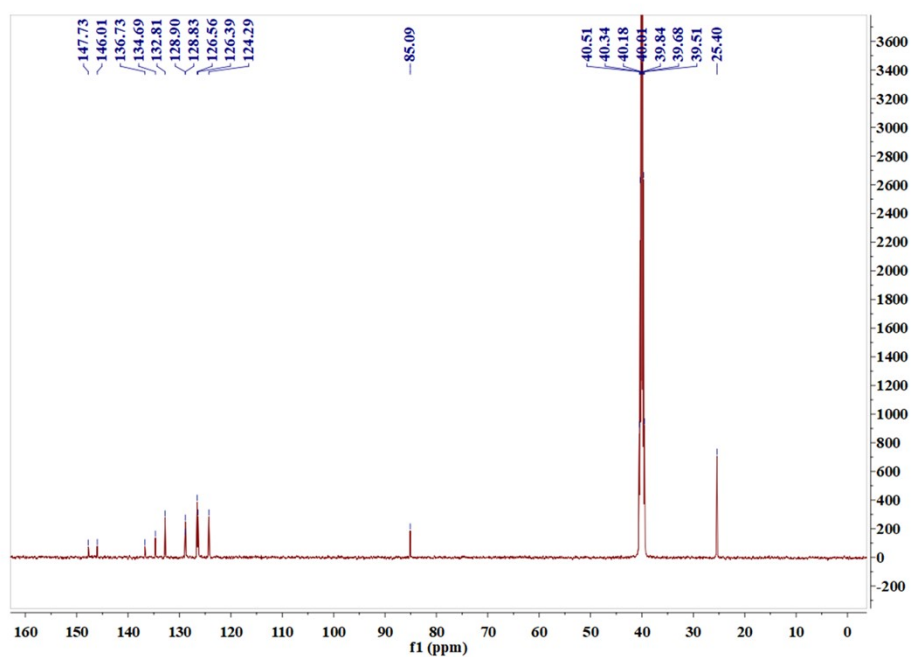

Fig. S15  $^{13}\text{C}$  NMR spectrum of BO conducted in DMSO.

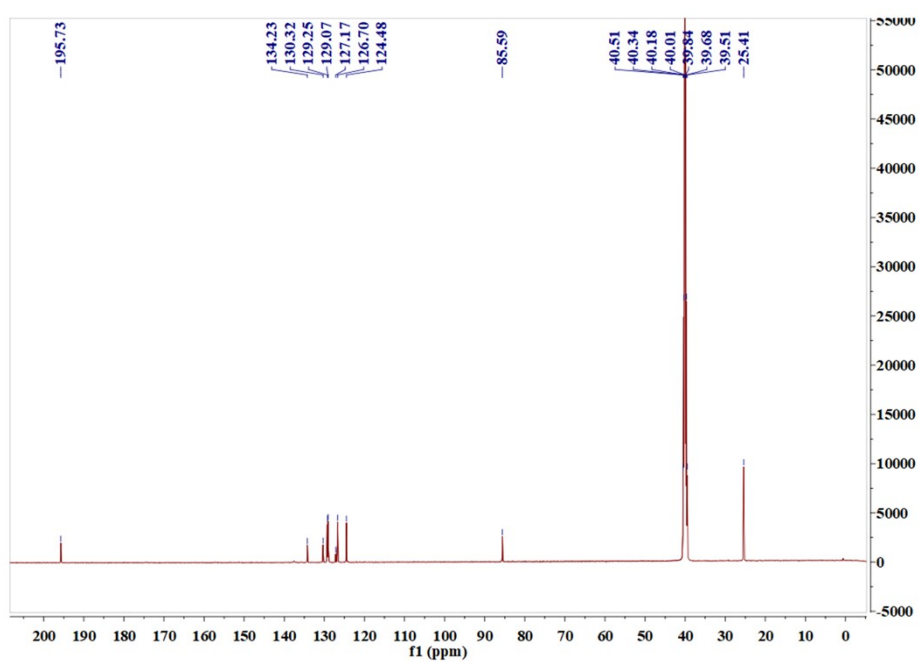

Fig. S16  $^{13}\text{C}$  NMR spectrum of BE conducted in DMSO.

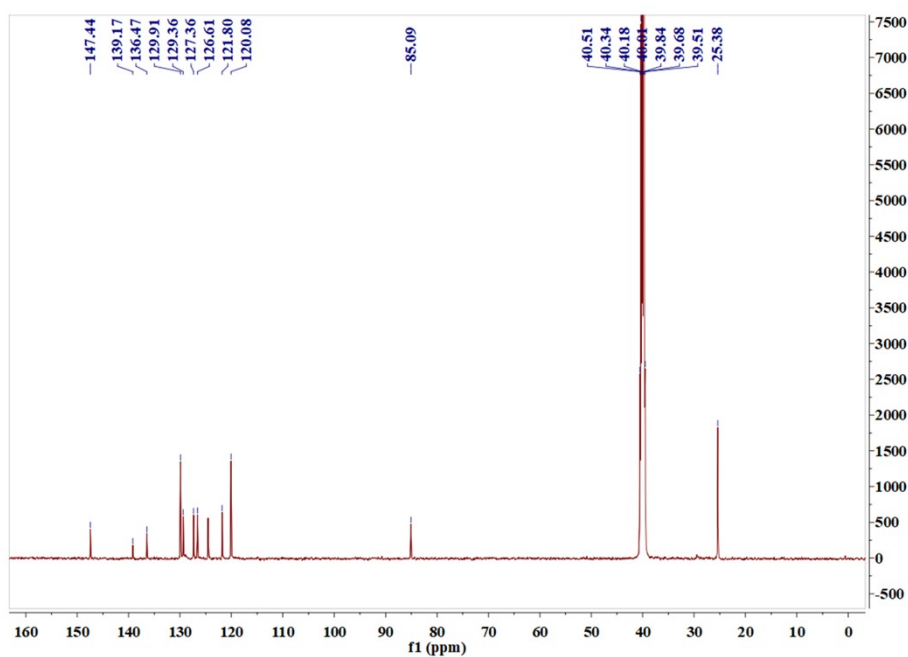

**Fig. S17**  $^{13}\text{C}$  NMR spectrum of BB conducted in DMSO.

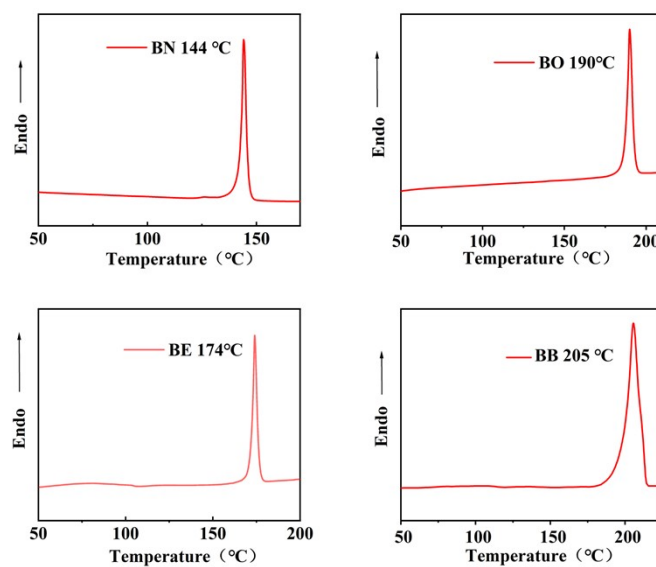

**Fig. S18** DSC curves of the BN, BO, BE and BB.
